# Supplementary material for: High concentration aqueous magnetic fluids: structure, colloidal stability, magnetic and flow properties
Source: Royal Society of Chemistry journal article supplement (doi:10.1039/c7sm02417g), 2018-01-01
Supplement: c7sm02417g1.pdf [file c7sm02417g1.pdf]

## Supplementary data

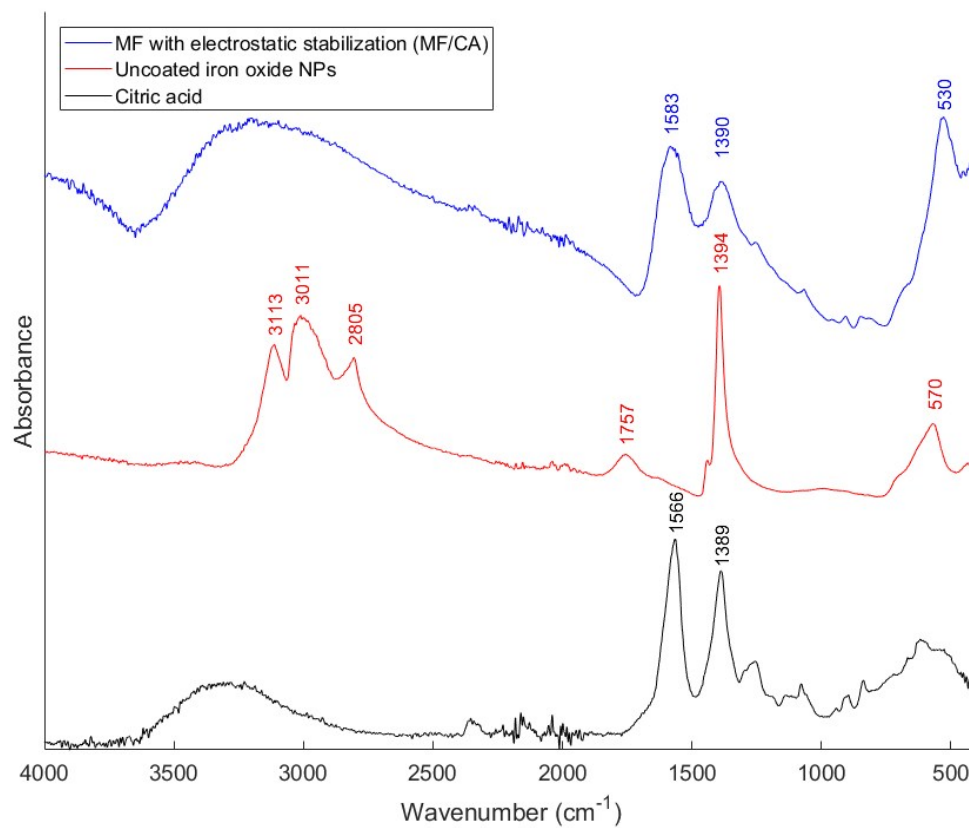

Figure S1. ATR-FTIR spectra measured from dried solutions of electrostatically stabilized magnetic fluid, uncoated iron oxide nanoparticles and citric acid. The pH of MF/CA sample was ~7 and that of the reference samples was adjusted to ~7.

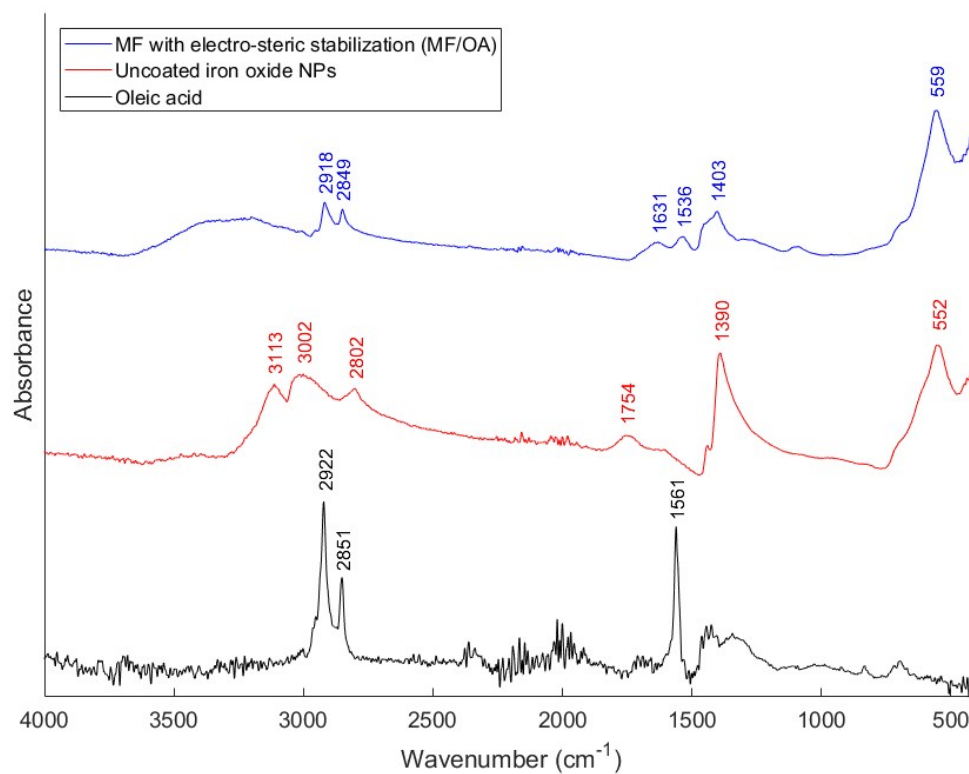

Figure S2. ATR-FTIR spectra measured from dried solutions of electro-sterically stabilized magnetic fluid, uncoated iron oxide nanoparticles and oleic acid. The pH of MF/OA sample was  $\sim 9$  and that of the reference samples was adjusted to  $\sim 9$ .
